# Supplementary material
Source: MDPI journal article supplement (https://www.mdpi.com/2311-5637/9/6/515)
Supplement: s1 [file s1]

**Table S1.** Change of volatile compounds (mg/kg) during the fermentation of low-salt Yulu with *B. subtilis*.

| No.                 | Volatile compounds                   | BS5          | BS10        | BS15        | BS30        | BS45        |
|---------------------|--------------------------------------|--------------|-------------|-------------|-------------|-------------|
| Aldehyde (25 kinds) |                                      |              |             |             |             |             |
| 1                   | Acetaldehyde                         | 0.022±0.006  | 0.010±0.003 | 0.117±0.041 | ND          | 0.068±0.013 |
| 2                   | Propanal                             | ND           | 0.005±0.001 | 0.055±0.08  | 0.020±0.001 | 0.040±0.003 |
| 3                   | 2-Butenal                            | ND           | ND          | 0.013±0.001 | ND          | ND          |
| 4                   | Isobutyraldehyde                     | 0.003±0.000  | 0.008±0.002 | 0.006±0.000 | 0.105±0.005 | 0.076±0.026 |
| 5                   | 3-Methyl-2-butenal                   | 0.019±0.003  | 0.038±0.010 | ND          | ND          | ND          |
| 6                   | 2-Methyl-2-butenal                   | 0.076±0.006  | 0.102±0.015 | 0.065±0.021 | 0.041±0.000 | 0.042±0.003 |
| 7                   | 2-Methylbutyraldehyde*               | 0.043±0.019  | 0.051±0.013 | 0.262±0.010 | 0.361±0.027 | 0.385±0.020 |
| 8                   | 3-Methylbutyraldehyde*               | 0.075±0.023  | 0.065±0.020 | 0.702±0.197 | 0.762±0.026 | 0.835±0.201 |
| 9                   | 2-Ethyl-2-butenal*                   | ND           | 0.017±0.001 | 0.116±0.024 | 0.032±0.014 | 0.037±0.006 |
| 10                  | 2-Hexenal*                           | 0.009±0.00   | 0.024±0.005 | 0.154±0.008 | ND          | 0.024±0.004 |
| 11                  | Hexanal*                             | 0.054±0.006  | 0.139±0.036 | 0.409±0.033 | 0.099±0.029 | 0.100±0.012 |
| 12                  | Benzaldehyde*                        | 0.532±0.021  | 0.501±0.079 | 1.073±0.073 | 0.369±0.041 | 0.705±0.145 |
| 13                  | (E,E)-2,4-Heptadienal*               | ND           | 0.026±0.006 | 0.239±0.027 | ND          | 0.024±0.004 |
| 14                  | (E)-2-Heptenal                       | ND           | ND          | 0.058±0.008 | ND          | ND          |
| 15                  | 5-Ethylcyclopent-1-enecarboxaldehyde | 0.004±0.001  | 0.021±0.003 | 0.072±0.006 | 0.013±0.002 | 0.014±0.004 |
| 16                  | (E)-2-Octenal*                       | ND           | ND          | 0.335±0.065 | 0.007±0.003 | 0.024±0.020 |
| 17                  | 2-Ethylbenzaldehyde                  | ND           | 0.005±0.001 | 0.044±0.001 | 0.005±0.001 | 0.011±0.001 |
| 18                  | 3-Ethylbenzaldehyde*                 | 0.026±0.001  | 0.058±0.012 | 0.339±0.019 | 0.063±0.007 | 0.174±0.074 |
| 19                  | 3-Methoxybenzaldehyde                | 0.015±0.002  | 0.013±0.000 | 0.017±0.001 | 0.010±0.002 | ND          |
| 20                  | (E,Z)-2,6-Nonadienal                 | ND           | 0.006±0.005 | 0.093±0.007 | ND          | 0.024±0.004 |
| 21                  | (E)-2-Nonenal                        | ND           | 0.004±0.000 | 0.408±0.103 | ND          | ND          |
| 22                  | Nonanal                              | 0.012±0.002  | 0.037±0.003 | 1.322±0.318 | ND          | ND          |
| 23                  | (E)-2-Decenal                        | ND           | ND          | 0.271±0.043 | ND          | ND          |
| 24                  | Lilac aldehyde D*                    | ND           | ND          | 1.379±0.313 | 0.265±0.080 | 0.540±0.098 |
| 25                  | (Z)-13-Octadecenal*                  | ND           | ND          | 0.150±0.009 | 0.024±0.004 | 0.049±0.029 |
| Alcohol (17 kinds)  |                                      |              |             |             |             |             |
| 1                   | Ethanol                              | 0.044±0.013  | 0.026±0.004 | 0.013±0.000 | 0.014±0.010 | 0.013±0.003 |
| 2                   | Methanethiol                         | 0.032±0.014  | 0.021±0.007 | 0.012±0.002 | 0.158±0.001 | 0.238±0.028 |
| 3                   | 1-Penten-3-ol*                       | 0.178±0.010  | 0.154±0.002 | 0.238±0.018 | 0.164±0.041 | 0.175±0.004 |
| 4                   | (E)-2-Penten-1-ol                    | 0.064±0.002  | 0.063±0.009 | 0.074±0.024 | 0.077±0.013 | 0.076±0.001 |
| 5                   | (Z)-2-Penten-1-ol                    | 0.029±0.000  | 0.037±0.002 | 0.056±0.001 | 0.043±0.005 | 0.036±0.008 |
| 6                   | 1-Pentanol                           | 0.035±0.004  | 0.033±0.002 | 0.073±0.022 | 0.022±0.009 | 0.034±0.002 |
| 7                   | Glycerin                             | ND           | ND          | 0.194±0.006 | 0.504±0.077 | 0.668±0.126 |
| 8                   | 1-Hexanol                            | 0.031±0.001  | 0.036±0.003 | 0.056±0.004 | 0.028±0.006 | 0.027±0.001 |
| 9                   | Benzyl alcohol                       | 0.008±0.000  | 0.015±0.001 | 0.094±0.021 | 0.060±0.013 | 0.097±0.003 |
| 10                  | 1-Heptanol*                          | 0.052±0.005  | 0.070±0.022 | 0.270±0.006 | 0.139±0.068 | 0.209±0.031 |
| 11                  | Phenylethyl Alcohol                  | 0.073±0.013  | 0.051±0.004 | 0.070±0.029 | ND          | ND          |
| 12                  | 2-Octyn-1-ol                         | ND           | ND          | 0.091±0.009 | 0.024±0.004 | 0.085±0.011 |
| 13                  | 1-Octen-3-ol*                        | 0.215±0.045  | 0.332±0.042 | 0.780±0.027 | 0.248±0.015 | 0.217±0.019 |
| 14                  | (E)-2-Octen-1-ol*                    | 0.061±0.010  | 0.084±0.022 | 0.205±0.016 | 0.071±0.005 | 0.090±0.016 |
| 15                  | 2-Ethylhexanol                       | 0.080±0.009  | 0.057±0.011 | 0.017±0.005 | 0.012±0.005 | 0.017±0.003 |
| 16                  | 1-Octanol*                           | 0.061±0.002  | 0.064±0.014 | 0.384±0.002 | 0.099±0.014 | 0.158±0.036 |
| 17                  | 1-Nonanol*                           | 0.035±0.005  | ND          | 0.307±0.016 | 0.049±0.001 | 0.175±0.050 |
| Ketone (13 kinds)   |                                      |              |             |             |             |             |
| 1                   | 2-Butanone                           | 0.080±0.005  | 0.080±0.010 | 0.038±0.017 | 0.031±0.001 | 0.031±0.001 |
| 2                   | 2-Pyrrolidinone                      | ND           | ND          | 0.012±0.002 | 0.029±0.000 | 0.038±0.010 |
| 3                   | 3-Pentanone                          | 0.0016±0.001 | 0.016±0.001 | 0.004±0.000 | 0.003±0.002 | ND          |
| 4                   | 2,3-Pentanedione                     | 0.074±0.003  | 0.062±0.002 | 0.086±0.003 | 0.030±0.008 | 0.037±0.003 |
| 5                   | 1,4-Cyclohexanedione*                | 0.034±0.000  | 0.080±0.007 | 0.035±0.005 | 0.113±0.004 | 0.124±0.008 |

|                              |                                |             |             |             |             |             |
|------------------------------|--------------------------------|-------------|-------------|-------------|-------------|-------------|
| 6                            | 1-Hepten-3-one                 | ND          | ND          | 0.061±0.004 | ND          | ND          |
| 7                            | 2-Heptanone                    | 0.057±0.002 | ND          | 0.019±0.009 | ND          | 0.006±0.005 |
| 8                            | Acetophenone                   | ND          | 0.007±0.003 | 0.021±0.009 | 0.040±0.007 | 0.043±0.003 |
| 9                            | 3,5-Octadien-2-one*            | ND          | 0.022±0.002 | 0.667±0.087 | 0.149±0.033 | 0.286±0.026 |
| 10                           | 1-(3-Butyloxiranyl)ethanone    | ND          | ND          | 0.071±0.029 | ND          | 0.053±0.007 |
| 11                           | 2-Nonanone*                    | 0.013±0.001 | 0.019±0.009 | 0.302±0.041 | 0.027±0.003 | 0.042±0.002 |
| 12                           | ortho-Hydroxypropiophenone     | ND          | ND          | 0.023±0.010 | 0.005±0.002 | 0.018±0.000 |
| 13                           | 2-Undecanone*                  | 0.016±0.004 | 0.036±0.006 | 1.228±0.249 | 0.241±0.40  | 0.497±0.099 |
| Acids (11 kinds)             |                                |             |             |             |             |             |
| 1                            | Acetic acid*                   | 0.058±0.004 | 0.035±0.005 | ND          | 0.128±0.011 | 0.100±0.022 |
| 2                            | L-Lactic acid*                 | ND          | ND          | 0.503±0.097 | 1.155±0.100 | 0.886±0.114 |
| 3                            | Propanoic acid                 | 0.015±0.005 | ND          | 0.011±0.001 | 0.006±0.003 | 0.024±0.001 |
| 4                            | Butanoic acid                  | 0.021±0.001 | 0.022±0.003 | 0.008±0.001 | 0.013±0.003 | 0.014±0.006 |
| 5                            | 3-Methylbutanoic acid          | 0.110±0.001 | 0.092±0.032 | ND          | 0.058±0.009 | 0.075±0.010 |
| 6                            | Pentanoic acid                 | 0.012±0.000 | 0.020±0.002 | ND          | 0.015±0.001 | 0.023±0.001 |
| 7                            | Hexanoic acid*                 | 0.100±0.002 | 0.145±0.019 | 0.235±0.014 | 0.197±0.023 | 0.276±0.011 |
| 8                            | Heptanoic acid                 | 0.012±0.001 | 0.017±0.001 | 0.058±0.005 | 0.035±0.008 | 0.059±0.008 |
| 9                            | Octanoic acid*                 | 0.109±0.036 | 0.062±0.002 | 0.220±0.063 | 0.141±0.017 | 0.243±0.015 |
| 10                           | Nonanoic acid*                 | ND          | ND          | 0.143±0.011 | 0.045±0.005 | 0.106±0.012 |
| 11                           | n-Decanoic acid*               | 0.088±0.033 | 0.045±0.002 | 0.147±0.029 | 0.071±0.013 | 0.058±0.008 |
| Ester (19 kinds)             |                                |             |             |             |             |             |
| 1                            | Methyl acetate                 | 0.035±0.003 | 0.038±0.009 | 0.038±0.005 | 0.032±0.004 | 0.042±0.006 |
| 2                            | Ethyl acetate*                 | 0.941±0.160 | 0.907±0.140 | 0.614±0.099 | 0.511±0.01  | 0.502±0.013 |
| 3                            | Butyl acetate                  | 0.177±0.008 | 0.193±0.038 | 0.057±0.017 | 0.072±0.001 | 0.047±0.001 |
| 4                            | Methyl caproate                | 0.080±0.007 | 0.083±0.007 | 0.014±0.001 | ND          | ND          |
| 5                            | Ethenyl hexanoate              | 0.049±0.004 | 0.089±0.011 | 0.067±0.013 | 0.035±0.004 | 0.027±0.003 |
| 6                            | Methyl 2-oxohexanoate          | ND          | 0.013±0.003 | 0.065±0.001 | 0.033±0.003 | 0.023±0.003 |
| 7                            | Methyl heptanoate              | 0.007±0.003 | 0.012±0.002 | 0.014±0.006 | ND          | ND          |
| 8                            | Ethyl hexanoate                | 0.003±0.001 | 0.018±0.001 | 0.007±0.003 | 0.005±0.000 | 0.007±0.003 |
| 9                            | Methyl octanoate               | 0.014±0.005 | 0.016±0.002 | 0.078±0.006 | 0.016±0.001 | 0.041±0.005 |
| 10                           | Methyl nonanoate               | ND          | ND          | 0.130±0.021 | 0.037±0.019 | 0.078±0.017 |
| 11                           | Methyl laurate                 | ND          | ND          | ND          | ND          | 0.064±0.003 |
| 12                           | Methyl dodecanoate*            | ND          | ND          | 0.080±0.024 | 0.063±0.005 | 0.124±0.003 |
| 13                           | Methyl tridecanoate            | ND          | ND          | ND          | 0.029±0.007 | 0.049±0.001 |
| 14                           | Methyl tetradecanoate*         | 0.051±0.009 | 0.088±0.002 | 0.421±0.098 | 0.553±0.095 | 1.021±0.019 |
| 15                           | Methyl 13-methyltetradecanoate | ND          | ND          | 0.012±0.002 | 0.022±0.006 | 0.047±0.001 |
| 16                           | Methyl pentadecanoate*         | ND          | ND          | 0.010±0.007 | 0.051±0.009 | 0.111±0.003 |
| 17                           | Methyl palmitoleate*           | ND          | 0.019±0.002 | 0.121±0.075 | 0.148±0.028 | 0.280±0.030 |
| 18                           | Methyl hexadecanoate*          | 0.020±0.008 | 0.040±0.06  | 0.239±0.052 | 0.352±0.034 | 0.762±0.034 |
| 19                           | Methyl benzoate                | 0.006±0.000 | ND          | ND          | ND          | ND          |
| Furan (6 kinds)              |                                |             |             |             |             |             |
| 1                            | 4-Methyl-2,3-dihydrofuran      | ND          | 0.008±0.002 | 0.031±0.009 | ND          | 0.011±0.001 |
| 2                            | 2-Ethylfuran*                  | 0.241±0.015 | 0.306±0.071 | 0.305±0.012 | 0.220±0.020 | 0.241±0.011 |
| 3                            | 2-Propylfuran                  | 0.002±0.000 | 0.008±0.001 | 0.012±0.002 | ND          | ND          |
| 4                            | cis-2-(2-Pentenyl)furan*       | 0.047±0.000 | 0.007±0.003 | 0.104±0.004 | 0.136±0.016 | 0.116±0.018 |
| 5                            | trans-2-(2-Pentenyl)furan*     | 0.027±0.002 | 0.084±0.008 | 0.083±0.024 | ND          | 0.107±0.007 |
| 6                            | 2-Pentylfuran*                 | 0.052±0.003 | 0.066±0.009 | 0.200±0.001 | 0.087±0.003 | 0.123±0.003 |
| Nitrogen compound (10 kinds) |                                |             |             |             |             |             |
| 1                            | Pyridine                       | 0.002±0.000 | 0.007±0.002 | 0.004±0.003 | 0.026±0.007 | 0.022±0.002 |
| 2                            | 2-Ethylpyridine                | 0.007±0.000 | 0.012±0.001 | 0.056±0.024 | 0.032±0.009 | 0.044±0.000 |
| 3                            | 3-Ethylpyridine                | ND          | ND          | ND          | 0.010±0.002 | 0.008±0.002 |
| 4                            | 3-Phenylpyridine               | ND          | ND          | 0.007±0.002 | 0.022±0.003 | 0.042±0.012 |

|                              |                               |             |             |             |             |             |
|------------------------------|-------------------------------|-------------|-------------|-------------|-------------|-------------|
| 5                            | 2-Methylpyrazine              | 0.009±0.001 | 0.014±0.002 | ND          | 0.026±0.006 | 0.028±0.006 |
| 6                            | 2-Methoxy-6-methylpyrazine    | 0.011±0.002 | 0.012±0.001 | 0.012±0.002 | 0.015±0.003 | 0.020±0.006 |
| 7                            | 3,5-Diamino-1,2,4-triazole    | ND          | ND          | 0.042±0.001 | 0.016±0.003 | 0.013±0.003 |
| 8                            | Trimethylamine*               | 0.060±0.024 | 0.035±0.007 | ND          | 0.097±0.003 | 0.145±0.045 |
| 9                            | Isoxazole                     | ND          | ND          | 0.011±0.001 | 0.058±0.014 | 0.090±0.022 |
| 10                           | n-Benzylidenemethylamine      | ND          | ND          | ND          | 0.013±0.001 | 0.020±0.001 |
| Sulfur compound (3 kinds)    |                               |             |             |             |             |             |
| 1                            | Dimethyl trisulfide           | ND          | ND          | ND          | 0.007±0.001 | 0.007±0.003 |
| 2                            | 4-Methyl-5-thiazolyethanol*   | 0.037±0.009 | 0.030±0.003 | 0.105±0.025 | 0.091±0.006 | 0.103±0.011 |
| 3                            | 3-Phenylthiophene             | ND          | ND          | ND          | 0.008±0.001 | 0.009±0.001 |
| Hydrocarbons (17 kinds)      |                               |             |             |             |             |             |
| 1                            | Octane                        | 0.008±0.003 | 0.014±0.006 | 0.027±0.003 | ND          | ND          |
| 2                            | 3,5,5-Trimethyl-2-hexene      | 0.158±0.025 | 0.275±0.088 | 0.204±0.004 | 0.205±0.019 | 0.082±0.018 |
| 3                            | Nonane                        | ND          | 0.018±0.002 | 0.037±0.013 | 0.009±0.001 | ND          |
| 4                            | beta-Myrcene                  | 0.004±0.001 | ND          | 0.024±0.003 | 0.017±0.000 | 0.019±0.003 |
| 5                            | D-Limonene*                   | 0.625±0.136 | 1.281±0.178 | 1.519±0.011 | 1.071±0.050 | 1.296±0.167 |
| 6                            | 4,5-Dimethylnonane            | 0.010±0.001 | 0.017±0.000 | 0.008±0.002 | ND          | ND          |
| 7                            | Undecane                      | 0.011±0.002 | 0.026±0.001 | 0.049±0.003 | 0.011±0.001 | 0.019±0.006 |
| 8                            | (E)-2,2-Dimethyl-4-decene     | 0.007±0.000 | 0.014±0.006 | 0.087±0.003 | ND          | ND          |
| 9                            | Dodecane                      | 0.034±0.004 | 0.045±0.001 | 0.213±0.020 | 0.107±0.031 | 0.189±0.015 |
| 10                           | 1-Tridecene                   | ND          | ND          | 0.074±0.022 | 0.005±0.000 | 0.022±0.002 |
| 11                           | Tridecane                     | 0.017±0.004 | 0.026±0.006 | 0.451±0.014 | 0.163±0.017 | 0.336±0.002 |
| 12                           | Tetradecane                   | ND          | ND          | ND          | 0.046±0.004 | 0.138±0.021 |
| 13                           | 1-Pentadecene                 | ND          | ND          | 0.093±0.019 | ND          | ND          |
| 14                           | Pentadecane                   | 0.014±0.001 | 0.115±0.063 | 4.878±0.359 | 1.627±0.145 | 3.291±0.092 |
| 15                           | 8-Heptadecene                 | ND          | ND          | 0.083±0.031 | 0.021±0.001 | 0.027±0.003 |
| 16                           | Heptadecane                   | ND          | ND          | 0.209±0.014 | 0.113±0.004 | 0.194±0.008 |
| 17                           | Octadecane                    | ND          | ND          | 0.047±0.003 | 0.085±0.026 | ND          |
| Aromatic compound (12 kinds) |                               |             |             |             |             |             |
| 1                            | Toluene                       | 0.051±0.006 | 0.153±0.027 | 0.058±0.010 | 0.100±0.006 | 0.079±0.002 |
| 2                            | Phenol                        | 0.031±0.008 | 0.038±0.004 | 0.073±0.010 | 0.037±0.004 | 0.061±0.001 |
| 3                            | Styrene                       | 0.139±0.017 | 0.377±0.033 | 0.620±0.079 | 1.264±0.047 | 1.495±0.292 |
| 4                            | m-Xylene                      | 0.046±0.016 | 0.172±0.034 | 0.096±0.038 | 0.241±0.052 | 0.189±0.002 |
| 5                            | Ethylbenzene                  | 0.053±0.018 | 0.218±0.048 | 0.038±0.010 | 0.127±0.051 | 0.099±0.012 |
| 6                            | o-Xylene                      | 0.084±0.026 | 0.107±0.044 | 0.092±0.025 | 0.128±0.008 | 0.118±0.032 |
| 7                            | p-Xylene                      | ND          | 0.205±0.046 | ND          | 0.164±0.024 | 0.164±0.036 |
| 8                            | 1,2,4-Trimethylbenzene        | 0.006±0.002 | 0.003±0.000 | 0.004±0.001 | ND          | ND          |
| 9                            | 4-Ethylphenol                 | 0.006±0.000 | 0.005±0.001 | 0.037±0.007 | 0.013±0.002 | 0.021±0.000 |
| 10                           | Naphthalene                   | 0.013±0.000 | 0.013±0.002 | 0.058±0.006 | 0.028±0.001 | ND          |
| 11                           | 1-Methyl-3-propan-2-ylbenzene | ND          | 0.033±0.004 | 0.017±0.007 | 0.011±0.009 | ND          |
| 12                           | 2,4-Di-tert-butylphenol       | 0.011±0.001 | 0.067±0.017 | ND          | 0.008±0.002 | 0.006±0.000 |

“ND” means not detected. “\*” means characteristic volatile flavor compounds.
